# Supplementary material for: Health economic evaluations based on routine data in Germany: a systematic review
Source: BMC Health Serv Res. 2018 Apr 10;18:268. doi: 10.1186/s12913-018-3080-3 (PMC5894241; doi:10.1186/s12913-018-3080-3)
Supplement: Supplementary file 1 — Study characteristics presented for each included study according to structured template. Includes detailed information on study characteristics as analyzed for the purpose of this review. (PDF 1440 kb) [file 12913_2018_3080_MOESM1_ESM.pdf]

**Additional file 1:** Study characteristics presented for each included study according to structured template

| Study                            | Journal                 | Language | Disease                                                                                          | Intervention                                                                                                                | Funding                                                 | Evaluation Type | Type stated | Routine Data (RD) source                                                                                  | Use of RD         | Only RD? | Study Size | Perspective                                              | Time Frame of analysis |
|----------------------------------|-------------------------|----------|--------------------------------------------------------------------------------------------------|-----------------------------------------------------------------------------------------------------------------------------|---------------------------------------------------------|-----------------|-------------|-----------------------------------------------------------------------------------------------------------|-------------------|----------|------------|----------------------------------------------------------|------------------------|
| <b>Abbas et al. 2013 [18]</b>    | Rehabilitation (Stuttg) | GER      | <b>SPECIFIC</b> cerebral infarction/stroke; ICD-10 I63, I64; after discharge; geriatric patients | <b>HCP</b> geriatric departments in hospitals (§109 SGB V) <b>VS</b> geriatric rehabilitation facilities (§111 SGB V)       | <b>PUBLIC</b> Hessian Ministry of Social Affairs        | CCA             | no          | <b>Insurance</b> AOK WldO AOK Bayern, Hessen Niedersachsen, Rheinland Pfalz, Saarland, Sachsen, Thüringen | costs and effects | yes      | n = 3472   | <b>payer</b> statutory nursing care and health insurance | 1 year                 |
| <b>Abbas et al. 2015 [19]</b>    | Z Gerontol Geriatr      | GER      | <b>SPECIFIC</b> femur fractures; ICD-10: S72; after discharge; geriatric patients                | <b>HCP</b> geriatric departments in hospitals (§109 SGB V) <b>VS</b> out-of-hospital rehabilitation facilities (§111 SGB V) | <b>PUBLIC</b> Hessian Ministry of Social Affairs        | CCA             | no          | <b>Insurance</b> AOK WldO AOK Bayern, Hessen Niedersachsen, Rheinland Pfalz, Saarland, Sachsen, Thüringen | costs and effects | yes      | n = 6089   | <b>not stated</b>                                        | 1 year                 |
| <b>Achelrod et al. 2016 [20]</b> | Eur J Health Econ       | ENG      | <b>1 SPECIFIC</b> COPD patients; ICD-GM-10 (J44)                                                 | <b>HCP</b> telemonitoring for COPD patients <b>VS</b> no telemonitoring                                                     | <b>INDUSTRY</b> AOK Bayern and SHL Telemedizin          | CEA             | yes         | <b>Insurance</b> AOK Bayern                                                                               | costs and effects | yes      | n = 7698   | <b>payer</b> statutory health insurance                  | 1 year                 |
| <b>Achelrod et al. 2016 [21]</b> | Health Policy           | ENG      | <b>SPECIFIC</b> chronic obstructive pulmonary disease (COPD) patients; ICD-GM-10 (J44)           | <b>HCP</b> disease management program (DMP) for COPD patients <b>VS</b> no participation in any DMP for COPD                | <b>PUBLIC</b> German Academic Research Foundation (DFG) | CEA             | yes         | <b>Insurance</b> Barmer GEK                                                                               | costs and effects | yes      | n = 215104 | <b>payer</b> statutory health insurance                  | 3 years                |

| Outcomes                                                                                                                                                                                                          | Costs                                                                                                                                                            | Summary Measure unit                                                                                                                       | Sel. Bias considered | Methods for Sel. Bias                          | Details on Methods                                                                                                                                                                                                                                                      | Data linkage                                                                                    | Handling of Uncertainty                                                                                                            | Software                           |
|-------------------------------------------------------------------------------------------------------------------------------------------------------------------------------------------------------------------|------------------------------------------------------------------------------------------------------------------------------------------------------------------|--------------------------------------------------------------------------------------------------------------------------------------------|----------------------|------------------------------------------------|-------------------------------------------------------------------------------------------------------------------------------------------------------------------------------------------------------------------------------------------------------------------------|-------------------------------------------------------------------------------------------------|------------------------------------------------------------------------------------------------------------------------------------|------------------------------------|
| mortality; rehospitalization due to ischemic stroke; rehospitalization due to fracture                                                                                                                            | costs for inpatient and outpatient care with and without long-term care                                                                                          | <b>Seperate</b> differences in mortality and rehospitalization as hazard ratio (HR); costs in euros                                        | yes                  | regression analysis                            | quantile regression for excess cost analysis, treatment and further co-variables as variables; cox regression to measure influence of treatment on time to death and rehospitalization, various confounders                                                             | not applicable for external sources; not addressed for linkage of inpatient and outpatient data | confidence intervals                                                                                                               | <b>SAS 9.2; MS-SQL-Server 2008</b> |
| mortality; rehospitalization due to femoral fracture                                                                                                                                                              | costs for inpatient and outpatient care with and without long-term care                                                                                          | <b>Seperate</b> differences in mortality and rehospitalization as HR; costs in euros                                                       | yes                  | regression analysis                            | quantile regression for excess cost analysis, treatment and further co-variables as variables; multivariate cox regression to measure influence of treatment on time to death and rehospitalization, various confounders                                                | not applicable for external sources; not addressed for linkage of inpatient and outpatient data | confidence intervals                                                                                                               | <b>SAS 9.2</b>                     |
| mortality; years of life lost; number of hospitalizations; number of outpatient physician visits; average length of stay; proportion of hospitalized patients; number of pharmaceutical prescriptions             | direct medical costs for inpatient and outpatient treatment, pharmaceuticals, and rehabilitation                                                                 | <b>ICER and seperate</b> ICER not applicable, mortality HR; cost savings in euros                                                          | yes                  | entropy balancing and difference-in-difference | (1) reweighting algorithm to remove imbalances in the mean and variance of pre-specified, observed covariates (e.g. age, sex)<br>(2) DiD estimation to determine differences in outcomes due to unobserved factors, comparing differences after and before intervention | not applicable for external sources; not addressed for linkage of inpatient and outpatient data | change in response to (1) exclusion of deceased individuals, (2) truncation of high-cost cases and (3) intention-to-treat analysis | not stated                         |
| mortality; morbidity; number of inpatient days/stay; average length of stay; proportion of hospitalized patients; number and proportion of outpatient physician visits; number of prescriptions and exacerbations | direct medical costs for inpatient and outpatient treatment, pharmaceuticals, rehabilitation and devices/medical appliances; administrative expenses for the DMP | <b>ICER and seperate</b> euros per life year gained; mortality rate; mortality hazards ratio; indicator values of morbidity costs in euros | yes                  | entropy balancing and difference-in-difference | (1) reweighting algorithm to remove imbalances in the mean and variance of pre-specified, observed covariates (e.g. age, sex)<br>(2) DiD estimation to determine differences in outcomes due to unobserved factors, comparing differences after and before intervention | not applicable for external sources; not addressed for linkage of inpatient and outpatient data | impact of (1) mortality, (2) misdiagnosis of COPD, (3) exposure time to DMP and (4) drop-out from DMP                              | not stated                         |

| Study                              | Journal                          | Language | Disease                                                                        | Intervention                                                                                          | Funding                                                         | Evaluation Type | Type stated | Routine Data (RD) source                               | Use of RD         | Only RD? | Study Size | Perspective                                | Time Frame of analysis            |
|------------------------------------|----------------------------------|----------|--------------------------------------------------------------------------------|-------------------------------------------------------------------------------------------------------|-----------------------------------------------------------------|-----------------|-------------|--------------------------------------------------------|-------------------|----------|------------|--------------------------------------------|-----------------------------------|
| Aljutaili et al. 2014 [22]         | BMC Health Serv Res              | ENG      | <b>SPECIFIC</b><br>CHD (coronary heart disease) prevention                     | <b>HCP</b><br>KardioPro (individualised prevention program to prevent CHD) <b>VS</b> non-participants | <b>PUBLIC AND INDUSTRY</b><br>SBK and Helmholtz Zentrum München | CEA             | yes         | <b>Insurance</b><br>SBK (Siemens-Betriebskrankenkasse) | costs and effects | yes      | n = 26224  | <b>payer</b><br>statutory health insurance | mean observation period 2.4 years |
| Bäumler et al. 2012 [2]            | Appl Health Econ Health Policy   | ENG      | <b>SPECIFIC</b><br>patients with acute myocardial infarction (AMI); ICD 10-I21 | <b>MP</b><br>drug eluting stents (DES) <b>VS</b> bare-metal stents (BMS)                              | <b>PUBLIC</b><br>Technical University of Berlin                 | CEA             | yes         | <b>Insurance</b><br>TK (Techniker Krankenkasse)        | costs and effects | yes      | n = 1438   | <b>payer</b><br>statutory health insurance | 1 year                            |
| Bäumler et al. 2014 [23]           | Int J Technol Assess Health Care | ENG      | <b>SPECIFIC</b><br>patients who underwent a penetrating keraplasty             | <b>MP</b><br>human leukocyte antigen matching <b>VS</b> no matching                                   | <b>PUBLIC</b><br>German Academic Research Foundation (DFG)      | CEA             | yes         | <b>Hospital</b><br>Freiburg University Eye Hospital    | effects           | no       | n = 721    | <b>payer</b><br>statutory health insurance | 6 years and 2 months              |
| Bischoff-Everding et al. 2016 [24] | Int J Womens Health              | ENG      | <b>SPECIFIC</b><br>women with monorrhagia; ICD-10-GM-N92.0, N92.1 and N92.3-6  | <b>MP</b><br>endometrial radiofrequency ablation <b>VS</b> other ablation techniques                  | <b>INDUSTRY</b><br>Hologic Deutschland GmbH                     | CCA             | no          | <b>Insurance</b><br>SHI database (not specified)       | costs and effects | yes      | n = 88     | <b>payer</b><br>statutory health insurance | 2 years and 3 months              |
| Drabik et al. 2012 [25]            | Diabetes Res Clin Pract          | ENG      | <b>SPECIFIC</b><br>type 2 diabetes mellitus (T2DM)                             | <b>HCP</b><br>DMP <b>VS</b> routine care                                                              | <b>NONE</b>                                                     | CEA             | yes         | <b>Insurance</b><br>Barmer GEK                         | costs and effects | yes      | n = 39776  | <b>payer</b><br>statutory health insurance | 19 years                          |

| Outcomes                                                                                                                                | Costs                                                                                                                                                          | Summary Measure unit                                                                                                                           | Sel. Bias considered | Methods for Sel. Bias     | Details on Methods                                                                                                                                                                                                                                      | Data linkage                                                                                    | Handling of Uncertainty                                                                                                     | Software                                                                                  |
|-----------------------------------------------------------------------------------------------------------------------------------------|----------------------------------------------------------------------------------------------------------------------------------------------------------------|------------------------------------------------------------------------------------------------------------------------------------------------|----------------------|---------------------------|---------------------------------------------------------------------------------------------------------------------------------------------------------------------------------------------------------------------------------------------------------|-------------------------------------------------------------------------------------------------|-----------------------------------------------------------------------------------------------------------------------------|-------------------------------------------------------------------------------------------|
| event-free time in days (myocardial infarction, stroke, death); death-free time in days                                                 | hospital costs; pharmaceutical costs; physician costs; other costs (e.g. physiotherapy, laboratory resources, services like acupuncture and sickness benefits) | <b>ICER and separate</b><br>euros per event free year in different subgroups; event free time in days; costs in euros                          | yes                  | propensity score matching | propensity score (PS) computed by logistic regression; stepwise variable selection; approximate nearest neighbour 1:1 matching without replacement; baseline comparison after matching                                                                  | not applicable for external sources; not addressed for linkage of inpatient and outpatient data | deterministic approach with alternate discount rates bootstrapping with 10.000 on cost and effect samples to calculate ICER | <b>SAS 9.2</b>                                                                            |
| mortality (365-day survival)                                                                                                            | inpatient costs (mean cost of treatment, incremental cost 30 days after implantation)                                                                          | <b>ICER and separate</b><br>euros per life saved; average costs in euros; difference in 365-day survival in percent                            | yes                  | propensity score matching | PS computed by logistic regression; theoretical considerations and statistical methods (fast false selection rate) for variable selection; 1:1 optimal matching with replacement; calliper of 0.0005; goodness of fit by standardized differences (SDF) | not applicable for external sources; not addressed for linkage of inpatient and outpatient data | bootstrapping for ICER, restricted definition of costs, re-estimating model, stratified analysis                            | <b>SAS 9.2</b>                                                                            |
| graft survival                                                                                                                          | direct costs (costs of graft, cost of hospital admission, cost of keratoplasty procedure, cost of follow-up visits, medication during follow-up)               | <b>ICER and separate</b><br>euros per additional day of graft survival; rejection-free graft survival time in days; incremental costs in euros | yes                  | propensity score matching | PS computed by logistic regression; a priori selection of variables; 1:1 nearest neighbor matching with replacement; calliper of 0.01; SDF to evaluate goodness-of-fit (>10%)                                                                           | not applicable                                                                                  | multivariate sensitivity analysis regarding (1) extrapolation of survival and (2) cost of intervention                      | <b>SAS</b>                                                                                |
| rate of relapse (rate of repeat diagnoses of menorrhagia after index treatment); number of uterine treatments for recurrent menorrhagia | average costs of inpatient care; outpatient care; pharmaceuticals (outpatient setting); sick pay; remedies; medical aids; total costs                          | <b>Seperate</b><br>percentage of repeat diagnoses and frequency of hysterectomy; additional costs in euros                                     | yes                  | propensity score matching | PS computed by logistic regression; a priori selection of variables; GenMath matching algorithm with a caliper of 0.5; SDF and check of distributions after matching                                                                                    | not applicable for external sources; not addressed for linkage of inpatient and outpatient data | no                                                                                                                          | <b>SAS 9.2;</b><br>Microsoft Office <b>Excel 2010;</b><br><b>R</b> for GenMatch algorithm |
| life years gained; number of inpatient stays; duration of inpatient stays                                                               | average basic total costs (drug costs and hospital costs)                                                                                                      | <b>ICER and separate</b><br>euros per life-year gained; life years; costs in euros                                                             | yes                  | propensity score matching | PS computed by logistic regression; stepwise variable selection; 1:1 matching without replacement with Parson's 5 to 1 method; SDF to evaluate goodness-of-fit (<10%)                                                                                   | not applicable for external sources; not addressed for linkage of inpatient and outpatient data | sensitivity analysis with discount rates of 0 and 7 %                                                                       | <b>SAS 9.2;</b><br><b>R 2.10.1</b>                                                        |

| Study                     | Journal                          | Language | Disease                                                                                                                     | Intervention                                                                                                                 | Funding                                                         | Evaluation Type | Type stated | Routine Data (RD) source                        | Use of RD         | Only RD? | Study Size | Perspective                                | Time Frame of analysis |
|---------------------------|----------------------------------|----------|-----------------------------------------------------------------------------------------------------------------------------|------------------------------------------------------------------------------------------------------------------------------|-----------------------------------------------------------------|-----------------|-------------|-------------------------------------------------|-------------------|----------|------------|--------------------------------------------|------------------------|
| Drabik et al. 2012 [26]   | Popul Health Manag               | ENG      | <b>SPECIFIC</b><br>type 2 diabetes mellitus (T2DM)                                                                          | <b>HCP</b><br>DMP <b>VS</b> routine care                                                                                     | <b>NOT SPECIFIED</b>                                            | CEA             | no          | <b>Insurance</b><br>Barmer GEK                  | costs and effects | yes      | n = 39776  | <b>not stated</b>                          | 3 years                |
| Drabik et al. 2012 [27]   | Z Evid Fortbild Qual Gesundheits | GER      | <b>SPECIFIC</b><br>type 2 diabetes mellitus (T2DM)                                                                          | <b>HCP</b><br>DMP <b>VS</b> routine care                                                                                     | <b>NOT SPECIFIED</b>                                            | CCA             | no          | <b>Insurance</b><br>Barmer GEK                  | costs and effects | yes      | n = 39776  | <b>not stated</b>                          | 3 years                |
| Driessen et al. 1999 [28] | Nervenarzt                       | GER      | <b>SPECIFIC</b><br>alcohol-dependent patients                                                                               | <b>HCP</b><br>extended alcohol withdrawal treatment program (II) <b>VS</b> medical detoxification program (I)                | <b>NOT SPECIFIED</b>                                            | CCA             | yes         | <b>Insurance</b><br>AOK Lübeck                  | costs and effects | yes      | n = 94     | <b>not stated</b>                          | 10 years               |
| Freund et al. 2016 [29]   | Ann Intern Med                   | ENG      | <b>MORE THAN ONE MEDICAL INDICATION</b><br>type 2 diabetes, COPD, chronic heart failure, high likelihood of hospitalization | <b>HCP</b><br>protocol-based care management by medical assistants <b>VS</b> routine care                                    | <b>INDUSTRY</b><br>AOK Baden-Wuerttemberg and AOK Bundesverband | CCA             | no          | <b>Insurance</b><br>AOK Baden-Württemberg       | effects           | no       | n = 2076   | <b>not stated</b>                          | 1 year                 |
| Frey et al. 2014 [30]     | Eur J Health Econ                | ENG      | <b>SPECIFIC</b><br>patients hospitalized with schizophrenia; ICD-10-GM F20.x                                                | <b>Pharmaceutical</b><br>long-acting injectable risperidone (LAI-RIS) <b>VS</b> long-acting injectable flupentixol (LAI-FLX) | <b>INDUSTRY</b><br>Bayer Vital                                  | CEA             | yes         | <b>Insurance</b><br>TK (Techniker Krankenkasse) | costs and effects | yes      | n = 935    | <b>payer</b><br>statutory health insurance | 2 years                |

| Outcomes                                                                                                                                  | Costs                                                                                                                       | Summary Measure unit                                                                                                                       | Sel. Bias considered | Methods for Sel. Bias     | Details on Methods                                                                                                                                                                                           | Data linkage                                                                                    | Handling of Uncertainty                                                                                                                                                                                 | Software                                                                                                                        |
|-------------------------------------------------------------------------------------------------------------------------------------------|-----------------------------------------------------------------------------------------------------------------------------|--------------------------------------------------------------------------------------------------------------------------------------------|----------------------|---------------------------|--------------------------------------------------------------------------------------------------------------------------------------------------------------------------------------------------------------|-------------------------------------------------------------------------------------------------|---------------------------------------------------------------------------------------------------------------------------------------------------------------------------------------------------------|---------------------------------------------------------------------------------------------------------------------------------|
| mortality                                                                                                                                 | mean daily costs (drug costs and hospital costs); total costs (including DMP lump sum for administration and medical costs) | <b>Seperate</b><br>mean survival time in days; daily hospital and total costs in euros                                                     | yes                  | propensity score matching | PS computed by logistic regression; stepwise variable selection; 1:1 matching without replacement with Parson's 5 to 1 method; SDF for goodness-of-fit (<10%)                                                | not applicable for external sources; not addressed for linkage of inpatient and outpatient data | no                                                                                                                                                                                                      | <b>SAS 9.2</b>                                                                                                                  |
| mortality; complications; number of inpatient stays; duration of inpatient stays                                                          | average basic total costs (drug costs and hospital costs)                                                                   | <b>Seperate</b><br>mortality in absolute deaths and mortality rate; costs in euros                                                         | yes                  | propensity score matching | PS computed by stepwise logistic regression; matching with Parson's 5 to 1 method; 1:1 nearest neighbor approach without replacement; SDF to evaluate goodness-of-fit (<10%)                                 | not applicable for external sources; not addressed for linkage of inpatient and outpatient data | no                                                                                                                                                                                                      | <b>SAS 9.2</b>                                                                                                                  |
| number of hospitalizations; length of hospitalizations; days of incapacity to work; days of financial substitution for incapacity to work | total inpatient cost; treatment cost; therapy cost; inpatient cost                                                          | <b>Seperate</b><br>number of hospitalizations in days; length of stay in days; days of financial support; costs in euros                   | no                   | none                      | -                                                                                                                                                                                                            | not applicable for external sources; not addressed for linkage of inpatient and outpatient data | no                                                                                                                                                                                                      | <b>SPSS</b>                                                                                                                     |
| number of hospitalizations; mortality; quality of life (patient-reported)                                                                 | intervention costs                                                                                                          | <b>Seperate</b><br>number of hospitalizations and relative risk (RR); HR of mortality; quality-of-life scores; intervention costs in euros | yes                  | cluster-randomized trial  | random allocation of primary care practices; 1:1 block randomization with variable block lengths; stratified randomization according to population density; blinded assessment of end points by statistician | not addressed                                                                                   | sensitivity analysis with multivariate models                                                                                                                                                           | <b>R 3.2.0</b> for Windows (glmmADMB and coxme package); <b>Case Smart Suite Germany 0.7</b>                                    |
| days in hospital; probability of c-medication; 1-year treatment discontinuation in percent; 2-year treatment discontinuation in percent   | inpatient treatment cost; outpatient treatment cost; antipsychotic medication cost; co-medication cost; total cost          | <b>ICER and seperate</b><br>incremental costs per hospital day avoided; days in hospital; costs in euros                                   | yes                  | regression analysis       | multivariate regression methods to adjust for patient heterogeneity; cost, hospital days and probability of co-medication as function of effectiveness conditioning on risk-adjusted covariates              | not applicable (model)                                                                          | alternate structural specifications of the model; probabilistic sensitivity analyses (Monte-Carlo, 10.000 iterations); sampling of normal correlated coefficients for each covariate; subgroup analysis | <b>SAS 9.2;</b><br><b>R</b> (stats- and pscl packages) for statistical analysis;<br><b>MS Excel</b> for decision analysis model |

| Study                      | Journal                     | Language | Disease                                                                            | Intervention                                                                              | Funding                                                            | Evaluation Type | Type stated | Routine Data (RD) source          | Use of RD         | Only RD? | Study Size          | Perspective                                | Time Frame of analysis |
|----------------------------|-----------------------------|----------|------------------------------------------------------------------------------------|-------------------------------------------------------------------------------------------|--------------------------------------------------------------------|-----------------|-------------|-----------------------------------|-------------------|----------|---------------------|--------------------------------------------|------------------------|
| Gaertner et al. 2013 [31]  | Health Policy               | ENG      | <b>SPECIFIC</b><br>cancer patients in the last 6 months of life;<br>ICD-10 C00-C76 | <b>HCP</b><br>treatment in an inpatients palliative care (PC) unit <b>VS</b> no PC        | <b>PUBLIC</b><br>Dr. Werner Jackstädt-Foundation                   | CCA             | no          | <b>Insurance</b><br>Barmer GEK    | costs and effects | yes      | n = 1682            | <b>payer</b><br>statutory health insurance | 6 months               |
| Goltz et al. 2013 [32]     | Pharmaco epidemiol Drug Saf | ENG      | <b>SPECIFIC</b><br>patients with osteoporosis and previous osteoporotic fractures  | <b>HCP</b><br>program of integrated care (IC) <b>VS</b> insurants not enrolled in program | <b>INDUSTRY</b><br>AOK PLUS                                        | CCA             | yes         | <b>Insurance</b><br>AOK PLUS      | costs and effects | yes      | n = 4910            | <b>payer</b><br>statutory health insurance | 3 years                |
| Heinrich et al. 2013 [33]  | Osteoporosis Int            | ENG      | <b>NON-SPECIFIC INTERVENTION</b>                                                   | <b>HCP</b><br>multifactorial fall prevention program <b>VS</b> usual care                 | <b>PUBLIC</b><br>German Federal Ministry of Education and Research | CEA             | yes         | <b>Insurance</b><br>AOK (Bayern)  | costs and effects | yes      | n = 33152           | <b>payer</b><br>statutory health insurance | 1 year                 |
| Hendricks et al. 2014 [34] | Dtsch Arztebl Int           | ENG      | <b>SPECIFIC</b><br>patients with chronic heart failure                             | <b>HCP</b><br>case management program (CMP) <b>VS</b> German routine care                 | <b>INDUSTRY</b><br>participating company health insurers           | CCA             | no          | <b>Insurance</b><br>not specified | costs and effects | yes      | n = 1202            | <b>not stated</b>                          | 4 years and 6 months   |
| Karmann et al. 2015 [35]   | Eur J Health Econ           | ENG      | <b>SPECIFIC</b><br>rotavirus cases                                                 | <b>Pharmaceutical</b><br>rotavirus (RV) vaccination <b>VS</b> no vaccination              | <b>INDUSTRY</b><br>GlaxoSmith Kline                                | CEA             | no          | <b>Insurance</b><br>AOK PLUS      | costs and effects | no       | 360000 observations | <b>payer</b><br>statutory health insurance | 4 years                |

| Outcomes                                                                                                                                                                              | Costs                                                                                                                         | Summary Measure unit                                                                                                                              | Sel. Bias considered | Methods for Sel. Bias     | Details on Methods                                                                                                                                                        | Data linkage                                                                                                                                              | Handling of Uncertainty                                                                                                                | Software                                                   |
|---------------------------------------------------------------------------------------------------------------------------------------------------------------------------------------|-------------------------------------------------------------------------------------------------------------------------------|---------------------------------------------------------------------------------------------------------------------------------------------------|----------------------|---------------------------|---------------------------------------------------------------------------------------------------------------------------------------------------------------------------|-----------------------------------------------------------------------------------------------------------------------------------------------------------|----------------------------------------------------------------------------------------------------------------------------------------|------------------------------------------------------------|
| symptom control (opioid prescription); place of death (hospital); aggressiveness of care (prescription of chemotherapy); end-of-life decisions (prescription of artificial nutrition) | mean total health care costs; mean hospital costs; mean medication costs; additional medical services; remedies               | <b>Seperate</b> percentage of patients receiving opioids and chemotherapy; costs in euros                                                         | yes                  | propensity score matching | PS computed by stepwise logistic regression: 1:1 matching without replacement with Parson's 5 to 1 method; SDF to evaluate goodness-of-fit (<10%)                         | not applicable for external sources; not addressed for linkage of inpatient and outpatient data                                                           | confidence intervals                                                                                                                   | <b>SAS 9.2</b> for statistical analysis and matching       |
| fracture incidence; time to refracture in days; pain (median uptake of analgesics in DDD); medication supply                                                                          | costs for osteoporosis-related medication; treatment costs for osteoporosis-related fractures; integrated care program costs  | <b>Seperate</b> percentage of medication per year; fractures; costs in euros                                                                      | yes                  | 1:1 matching              | matching osteoporosis insurants based on age, sex and fracture location (not detailed description)                                                                        | not applicable for external sources; not addressed for linkage of inpatient and outpatient data                                                           | no                                                                                                                                     | <b>SPSS 17.0</b> for statistical analysis                  |
| mean number of incident femoral fractures; mean days free of femoral fracture; all cause mortality                                                                                    | costs per resident; mean direct costs for femoral fractures; mean total direct costs including intervention costs             | <b>ICER, net benefit and seperate</b> euros per year free of femoral fracture, adjusted NMB for different WTP for a year free of femoral fracture | yes                  | regression analysis       | multivariate regression model; adjustment for age, gender, level of care, and size of nursing home; regression analysis to analyze costs and cost-effectiveness using NMB | not applicable for external sources; linkage of different sectors for each individual with identification code                                            | sensitivity analyses performed on intervention costs (decrease and increase by 50%)                                                    | <b>SAS 9.2 PASW Statistics 20</b> for statistical analysis |
| hospital admission rate; hospital readmission rate; mortality; number of contacts with physicians per year; hospital stay duration                                                    | mean cost per heart failure-related hospital stay; annual heart failure related hospitalization costs                         | <b>Seperate</b> rate of hospital admission/readmission in percent; length of stay in days; costs in euros                                         | yes                  | propensity score matching | stepwise logistic regression to calculate PS; 1:1 matching; baseline comparison after matching                                                                            | not applicable for external sources; not addressed for linkage of inpatient and outpatient data                                                           | confidence intervals                                                                                                                   | <b>SPSS 19</b> for statistical analysis                    |
| number of RV cases; number of RV cases avoided                                                                                                                                        | direct medical costs (inpatient and outpatient treatment); direct non-medical costs (sickness-benefits); costs of vaccination | <b>ICER and seperate</b> cost savings per avoided case; number of RV cases; cost savings per 1000 children                                        | no                   | none                      | -                                                                                                                                                                         | analysis of inpatient and outpatients cases separately (not patients) since linkage of inpatient and outpatient treatment within one quarter not possible | univariate sensitivity analyses varying sensitive parameters (incidence rate, days absence from work) until net cost savings faded out | <b>MS Excel</b> for model                                  |

| Study                     | Journal                          | Language | Disease                                                                                                | Intervention                                                                                                                      | Funding                                     | Evaluation Type | Type stated | Routine Data (RD) source                         | Use of RD         | Only RD? | Study Size  | Perspective                                | Time Frame of analysis |
|---------------------------|----------------------------------|----------|--------------------------------------------------------------------------------------------------------|-----------------------------------------------------------------------------------------------------------------------------------|---------------------------------------------|-----------------|-------------|--------------------------------------------------|-------------------|----------|-------------|--------------------------------------------|------------------------|
| Kessel et al. 2015 [36]   | Expert Rev Med Devices           | ENG      | <b>SPECIFIC</b><br>women with menorrhagia;<br>ICD-10-GM-N92.0, N92.1 and N92.3-6                       | <b>MP</b><br>radiofrequency ablation (RFA) <b>VS</b> hysterectomy                                                                 | <b>INDUSTRY</b><br>Hologic Deutschland GmbH | CCA             | no          | <b>Insurance</b><br>SHI database (not specified) | costs and effects | yes      | n = 214     | <b>payer</b><br>statutory health insurance | 2 years and 3 months   |
| Kottmair et al. 2005 [37] | Health Care Financ Rev           | ENG      | <b>SPECIFIC</b><br>patients with congestive Heart Failure (CHF)                                        | <b>HCP</b><br>DMP <b>VS</b> routine care (RC)                                                                                     | <b>NOT SPECIFIED</b>                        | CCA             | no          | <b>Insurance</b><br>not specified                | costs and effects | yes      | n = 185     | <b>payer</b><br>health insurance           | 4 years                |
| Lange et al. 2014 [3]     | Spine                            | ENG      | <b>SPECIFIC</b><br>patients with osteoporotic vertebral compression fractures (OVCFs);<br>ICD-10 80.-8 | <b>MP</b><br>surgical treatment (balloon kyphoplasty (BKP) and percutaneous vertebroplasty (PVP)) <b>VS</b> nonsurgical treatment | <b>INDUSTRY</b><br>Medtronic International  | CEA             | no          | <b>Insurance</b><br>AOK Niedersachsen            | costs and effects | yes      | n = 3607    | <b>payer</b><br>statutory health insurance | 5 years                |
| Laux et al. 2013 [38]     | Z Evid Fortbild Qual Gesundheits | GER      | <b>NON-SPECIFIC INTERVENTION</b>                                                                       | <b>HCP</b><br>family-doctor centered care (HzV) enrollment <b>VS</b> no enrollment in HzV                                         | <b>NOT SPECIFIED</b>                        | CCA             | no          | <b>Insurance</b><br>AOK Baden-Wuerttemberg       | costs and effects | yes      | n = 1443161 | <b>not stated</b>                          | 1 year                 |

| Outcomes                                                                                                                                                                                               | Costs                                                                                                                                          | Summary Measure unit                                                                                                                     | Sel. Bias considered | Methods for Sel. Bias                                  | Details on Methods                                                                                                                                                                                                                                                                                                                                    | Data linkage                                                                                                                                                           | Handling of Uncertainty                 | Software                                                                                                                                                    |
|--------------------------------------------------------------------------------------------------------------------------------------------------------------------------------------------------------|------------------------------------------------------------------------------------------------------------------------------------------------|------------------------------------------------------------------------------------------------------------------------------------------|----------------------|--------------------------------------------------------|-------------------------------------------------------------------------------------------------------------------------------------------------------------------------------------------------------------------------------------------------------------------------------------------------------------------------------------------------------|------------------------------------------------------------------------------------------------------------------------------------------------------------------------|-----------------------------------------|-------------------------------------------------------------------------------------------------------------------------------------------------------------|
| type and number of post-surgical morbidities during QoT; complications in detected ICD codes; number of repeated diagnoses and surgical re-treatments                                                  | cost of medication; outpatient physician consultations; remedies; medical aids; sick pay hospital and dental consultations, total direct costs | <b>Seperate</b> percentage of patients with relevant morbidities needing surgical retreatments; mean number of recodings; costs in euros | yes                  | propensity score matching combined with exact matching | propensity score matching according to Rosenbaum and Rubin; exact matching by age class; 1:3 nearest neighbor matching with caliper of 0.4; baseline comparison after matching                                                                                                                                                                        | not applicable for external sources; not addressed for linkage of inpatient and outpatient data                                                                        | confidence intervals                    | <b>SAS 9.2</b><br><b>MS Excel 2010</b> for calculations and data preparations                                                                               |
| proportion of patients with edemas (patient-reported); quality of care expressed in terms of adherence to therapy guidelines                                                                           | total annual health care expenditures of insurance company                                                                                     | <b>Seperate</b> examples for proportions in percent                                                                                      | in part              | pre/post design                                        | -                                                                                                                                                                                                                                                                                                                                                     | not applicable for external sources; not addressed for linkage of inpatient and outpatient data                                                                        | no                                      | not stated                                                                                                                                                  |
| survival rate                                                                                                                                                                                          | total costs; inpatient costs; outpatient costs; pharmacy costs; costs for rehabilitation; sick leave payments; costs for remedies and aids     | <b>Seperate</b> survival rate in percent; costs in euros                                                                                 | in part              | regression analysis and propensity score matching      | multivariate cox regression model to evaluate joint effect of covariates on mortality risk to compare operated and nonoperated patients; propensity score matching to compare BKP and PBP group; logistic regression to determine PS; a priori variable selection; 1:1 nearest neighbor matching without replacement; SDF to evaluate goodness-of-fit | not applicable for external sources; merging of data via an identification number                                                                                      | not detailed; change of date of surgery | not stated                                                                                                                                                  |
| number of family doctor visits; number of specialist visits; rate of hospitalizations; duration of hospitalizations; rate of re-hospitalizations; rate of polypharmacy; rate of Me-Too pharmaceuticals | costs of pharmacotherapy                                                                                                                       | <b>Seperate</b> numbers of visits; rates in percent; costs in euros                                                                      | yes                  | regression analysis                                    | multivariate multilevel regression model; covariates: age, sex, nationality, insurance status, morbidity, duration of enrollment in HzV                                                                                                                                                                                                               | not applicable for external sources; merging of data via pseudonymised identification number for insurant and pseudonymised lifelong identification number for doctors | confidence intervals                    | <b>SAS 9.2</b> for statistical analysis<br><b>ORACLE MySQL</b> Community Server 5.5 and <b>IBM DB2</b> Workgroup Server 9.7 for data storage and processing |

| Study                      | Journal                 | Language | Disease                                             | Intervention                                                                                                                           | Funding                         | Evaluation Type | Type stated | Routine Data (RD) source                        | Use of RD         | Only RD? | Study Size | Perspective                                | Time Frame of analysis |
|----------------------------|-------------------------|----------|-----------------------------------------------------|----------------------------------------------------------------------------------------------------------------------------------------|---------------------------------|-----------------|-------------|-------------------------------------------------|-------------------|----------|------------|--------------------------------------------|------------------------|
| Linder et al. 2011 [39]    | Dtsch Arztebl Int       | ENG      | <b>SPECIFIC</b><br>type 2 diabetes mellitus (T2DM)  | <b>HCP</b><br>DMP for T2DM participants <b>VS</b> non-participants                                                                     | <b>NOT SPECIFIED</b>            | CCA             | no          | <b>Insurance</b><br>TK (Techniker Krankenkasse) | costs and effects | yes      | n = 107590 | <b>not stated</b>                          | 2 years                |
| Niedhart et al. 2013 [40]  | Z Orthop Unfall         | GER      | <b>SPECIFIC</b><br>osteoporosis; ICD-10 M80 or M81  | <b>HCP</b><br>Integrated care model osteoporosis <b>VS</b> routine care                                                                | <b>NOT SPECIFIED</b>            | CEA             | no          | <b>Insurance</b><br>AOK Rheinland, Hamburg      | costs and effects | yes      | n = 22040  | <b>payer</b><br>statutory health insurance | 3 years                |
| Rossaint et al. 2007 [41]  | Eur J Trauma Emerg Surg | ENG      | <b>SPECIFIC</b><br>severely injured trauma patients | <b>Pharmaceutical</b><br>Recombinant activated factor VII (rFVIIa) <b>VS</b> placebo to for control of bleeding in patients with blunt | <b>INDUSTRY</b><br>Novo Nordisk | CUA             | yes         | <b>Other</b><br>German Trauma Registry          | costs and effects | no       | n = 143    | <b>payer</b><br>statutory health insurance | lifetime               |
| Schneider et al. 2016 [42] | Health Policy           | ENG      | <b>NON-SPECIFIC INTERVENTION</b>                    | <b>HCP</b><br>graded return to work (RTW) program <b>VS</b> non-participants                                                           | <b>NOT SPECIFIED</b>            | CCA             | no          | <b>Insurance</b><br>TK (Techniker Krankenkasse) | costs and effects | yes      | n = 11212  | <b>payer</b><br>statutory health insurance | 1 year and 6 months    |

| Outcomes                                                                                                                                                                      | Costs                                                                                                                                                                                                                                                      | Summary Measure unit                                                                                                  | Sel. Bias considered | Methods for Sel. Bias     | Details on Methods                                                                                                                                                   | Data linkage                                                                                    | Handling of Uncertainty                                                                                                                                                                                          | Software                                                                                 |
|-------------------------------------------------------------------------------------------------------------------------------------------------------------------------------|------------------------------------------------------------------------------------------------------------------------------------------------------------------------------------------------------------------------------------------------------------|-----------------------------------------------------------------------------------------------------------------------|----------------------|---------------------------|----------------------------------------------------------------------------------------------------------------------------------------------------------------------|-------------------------------------------------------------------------------------------------|------------------------------------------------------------------------------------------------------------------------------------------------------------------------------------------------------------------|------------------------------------------------------------------------------------------|
| incidence of specific comorbidities; frequency of emergency inpatient admissions; use of pharmacotherapy; number of outpatient physician contacts; use of outpatient services | hospital costs; drug prescription costs                                                                                                                                                                                                                    | <b>Seperate</b><br>DALY-weighted incidence of co-morbidities; drug use in DDD; costs in euros                         | yes                  | propensity score matching | propensity score interval matching; a priori selection of variables; baseline comparison after matching                                                              | not applicable for external sources; not addressed for linkage of inpatient and outpatient data | no                                                                                                                                                                                                               | <b>PASW Statistics 18</b> and <b>SAS Enterprise Guide V.4.1</b> for statistical analysis |
| hospitalization rate for hip fractures                                                                                                                                        | total costs; total hospital costs; fracture-related hospital costs; inpatient care costs; outpatient care costs; total rehabilitation costs; inpatient rehabilitation; outpatient rehabilitation; remedies and medical aids; total and specific drug costs | <b>Seperate</b><br>hospitalisation rate per 1000 patient years; medication costs in euros                             | no                   | none                      | -                                                                                                                                                                    | not applicable for external sources; not addressed for linkage of inpatient and outpatient data | no                                                                                                                                                                                                               | <b>SAS</b> for statistical analysis                                                      |
| survival time in days; QALY                                                                                                                                                   | drug aquisitaion costs; total hospital costs; total lifetime costs                                                                                                                                                                                         | <b>ICER and seperate</b><br>euros per life-year gained; euros per QALY gained; cost-effectiveness acceptability curve | no                   | none                      | -                                                                                                                                                                    | not applicable (model)                                                                          | univariate sensitivity analysis to assess impact of key model parameters: mortality risk, discount rate for costs and effects, long-term costs, residual life expectancy, utility values in remaining life years | not stated                                                                               |
| days sick; days with sickness benefits; sickness benefits; sickness benefits per day                                                                                          | outpatient costs; hospital costs; pharmaceuticals; other costs; total costs; total costs without outpatient                                                                                                                                                | <b>Seperate</b><br>sick days; sickness benefits; expenditures                                                         | yes                  | propensity score matching | PS computed by logistic regression; stepwise variable selection; 1:1 matching without replacement (using 4-2 digit greedy matching); SDF to evaluate goodness-of-fit | not applicable for external sources; not addressed for linkage of inpatient and outpatient data | no                                                                                                                                                                                                               | not stated                                                                               |

| Study                             | Journal                          | Language | Disease                                                    | Intervention                                                                                                                                           | Funding                             | Evaluation Type | Type stated | Routine Data (RD) source                                                                                 | Use of RD         | Only RD? | Study Size | Perspective                                | Time Frame of analysis |
|-----------------------------------|----------------------------------|----------|------------------------------------------------------------|--------------------------------------------------------------------------------------------------------------------------------------------------------|-------------------------------------|-----------------|-------------|----------------------------------------------------------------------------------------------------------|-------------------|----------|------------|--------------------------------------------|------------------------|
| <b>Schulte et al. 2016 [43]</b>   | Z Evid Fortbild Qual Gesundheits | GER      | <b>SPECIFIC</b><br>coronary heart disease                  | <b>HCP</b><br>DMP <b>VS</b> routine care                                                                                                               | <b>NOT SPECIFIED</b>                | CCA             | no          | <b>Insurance</b><br>AOK Baden-Wuerttemberg                                                               | costs and effects | yes      | n = 382    | <b>not stated</b>                          | 3 years                |
| <b>Shearer et al. 2006 [44]</b>   | Pharmaco economics               | ENG      | <b>SPECIFIC</b><br>type 2 diabetes mellitus (T2DM)         | <b>Pharmaceutical</b><br>rosiglitazone in combination with other oral agents (two different strategies) <b>VS</b> conventional care (three strategies) | <b>INDUSTRY</b><br>GlaxoSmith Kline | CUA             | yes         | <b>Other</b><br>IMS (International Marketing Services Health) Disease analyser                           | costs             | no       | n = 1000   | <b>payer</b><br>statutory health insurance | lifetime               |
| <b>Stargardt et al. 2012 [45]</b> | J Clin Psychopharmacol           | ENG      | <b>SPECIFIC</b><br>schizophrenia;<br>ICD-10 F20.0 to F20.9 | <b>Pharmaceutical</b><br>atypical <b>VS</b> typical antipsychotic treatment for schizophrenia                                                          | <b>INDUSTRY</b><br>Janssen Cilag    | CCA             | no          | <b>Insurance</b><br>TK (Techniker Krankenkasse), AOK Baden-Wuerttemberg, AOK Westfalen-Lippe, AOK Berlin | costs and effects | yes      | n = 8610   | <b>payer</b><br>statutory health insurance | 1 year                 |
| <b>Stargardt et al. 2011 [46]</b> | Psychopharmacology (Berl)        | ENG      | <b>SPECIFIC</b><br>schizophrenia;<br>ICD-10 F20.x          | <b>Pharmaceutical</b><br>flupentixol <b>VS</b> other first- and second-generation antipsychotics                                                       | <b>INDUSTRY</b><br>Bayer Vital      | CCA             | no          | <b>Insurance</b><br>TK (Techniker Krankenkasse), AOK Baden-Wuerttemberg, AOK Westfalen-Lippe, AOK Berlin | costs and effects | yes      | n = 2890   | <b>payer</b><br>statutory health insurance | 1 year                 |
| <b>Stargardt et al. 2008 [47]</b> | J Ment Health Policy Econ        | ENG      | <b>SPECIFIC</b><br>schizophrenia;<br>ICD-10 F20.0 to F20.9 | <b>Pharmaceutical</b><br>atypical <b>VS</b> typical antipsychotic treatment for schizophrenia                                                          | <b>INDUSTRY</b><br>Janssen Cilag    | CCA             | no          | <b>Insurance</b><br>TK (Techniker Krankenkasse)                                                          | costs and effects | yes      | n = 3121   | <b>payer</b><br>statutory health insurance | 1 year                 |

| Outcomes                                                                                                                                | Costs                                                                                                                   | Summary Measure unit                                                                                      | Sel. Bias considered | Methods for Sel. Bias                                  | Details on Methods                                                                                                                                                                                                                                                                  | Data linkage                                                                                    | Handling of Uncertainty                                                                                                                                                                                | Software                                                                        |
|-----------------------------------------------------------------------------------------------------------------------------------------|-------------------------------------------------------------------------------------------------------------------------|-----------------------------------------------------------------------------------------------------------|----------------------|--------------------------------------------------------|-------------------------------------------------------------------------------------------------------------------------------------------------------------------------------------------------------------------------------------------------------------------------------------|-------------------------------------------------------------------------------------------------|--------------------------------------------------------------------------------------------------------------------------------------------------------------------------------------------------------|---------------------------------------------------------------------------------|
| mortality; guideline adherence (according to prescriptions), number of disease-related hospitalizations                                 | total costs; medication costs; outpatient costs; inpatient costs; costs of inpatient rehabilitation and cure            | <b>Seperate</b> survival time; number of prescriptions; total costs per person                            | yes                  | propensity score matching combined with exact matching | PS computed by logistic regression; theoretical reasoning for variable selection; exact matching for age, sex, insurance company, at least one CHD diagnosis and cost class; 1:1 nearest neighbor matching without replacement and caliper of 0.02; SDF to evaluate goodness-of-fit | not applicable for external sources; not addressed for linkage of inpatient and outpatient data | no                                                                                                                                                                                                     | <b>SPSS</b> for propensity scores;<br><b>Microsoft SQL</b> scripts for matching |
| life years; QALY                                                                                                                        | inpatient costs; ambulatory costs; rehabilitation costs; diabetes therapy costs; other medication costs; sickness leave | <b>ICER and seperate</b> euros per life-year gained; euros per QALY gained                                | no                   | none                                                   | -                                                                                                                                                                                                                                                                                   | not applicable (model)                                                                          | univariate sensitivity analysis with different therapy-switching threshold, discount rate of costs and effects, reduction of costs of rosiglitazone, clinical effectiveness of rosiglitazone treatment | not stated                                                                      |
| rehospitalization rate; mean hospital bed days; adverse effects                                                                         | cost of inpatient care; cost of antipsychotic treatment; cost of other pharmaceutical treatment                         | <b>Seperate</b> risk of rehospitalization; days hospitalized; costs in euros                              | in part              | confounding by switching within drug groups considered | to avoid bias through switching withing the two drug groups, analyses focused on patients who did not switch groups                                                                                                                                                                 | not applicable for external sources; not addressed for linkage of inpatient and outpatient data | no                                                                                                                                                                                                     | <b>SAS 9.1</b> for statistical analysis                                         |
| rehospitalization rate; mean hospital bed days; side effects                                                                            | cost of inpatient care; cost of antipsychotic treatment; cost of other pharmaceutical treatment                         | <b>Seperate</b> number of hospitalizations; days hospitalized; costs in euros                             | in part              | confounding by severity of disease considered          | collection of data on prior hospitalizations with a diagnosis of schizophrenia                                                                                                                                                                                                      | not applicable for external sources; not addressed for linkage of inpatient and outpatient data | inclusion of a variable for depot use as a dummy and continuous variable, no considerable impact on comparisons                                                                                        | <b>SAS 9.1</b> for statistical analysis                                         |
| rehospitalization rate; hospital bed days with a diagnosis of schizophrenia per year; number of hospitalizations per year; side effects | cost of inpatient care, cost of antipsychotic treatment, cost for other pharmaceuticals                                 | <b>Seperate</b> days hospitalized; length of stay; number of stays; costs in euros stratified by severity | in part              | confounding by severity of disease considered          | collection of data on prior hospitalizations with a diagnosis of schizophrenia                                                                                                                                                                                                      | not applicable for external sources; not addressed for linkage of inpatient and outpatient data | no                                                                                                                                                                                                     | <b>SAS 9.1</b> for statistical analysis                                         |

| Study                           | Journal               | Language | Disease                                                                                                         | Intervention                                                                                                      | Funding                                                            | Evaluation Type | Type stated | Routine Data (RD) source                                | Use of RD         | Only RD? | Study Size | Perspective                                | Time Frame of analysis       |
|---------------------------------|-----------------------|----------|-----------------------------------------------------------------------------------------------------------------|-------------------------------------------------------------------------------------------------------------------|--------------------------------------------------------------------|-----------------|-------------|---------------------------------------------------------|-------------------|----------|------------|--------------------------------------------|------------------------------|
| <b>Steinke et al. 2016 [48]</b> | Acta Derm Venereol    | ENG      | <b>SPECIFIC</b><br>notalgia paraesthetica (NP) and brachioradial pruritus (BRP) (forms of neuropathic pruritus) | <b>Pharmaceutical</b><br>Capsaicin 8% dermal patch <b>VS</b> routine care                                         | <b>INDUSTRY</b><br>Astellas Pharma GmbH                            | CEA             | yes         | <b>Hospital</b><br>Center for Chronic Pruritus, Münster | not specified     | no       | n = 44     | <b>payer</b><br>statutory health insurance | 6 months                     |
| <b>Stock et al. 2010 [49]</b>   | Health Aff (Millwood) | ENG      | <b>SPECIFIC</b><br>type 2 diabetes mellitus (T2DM)                                                              | <b>HCP</b><br>DMP <b>VS</b> routine care                                                                          | <b>NOT SPECIFIED</b>                                               | CCA             | no          | <b>Insurance</b><br>Barmer Ersatzkasse                  | costs and effects | yes      | n = 39764  | <b>not stated</b>                          | 4 years                      |
| <b>Walter et al. 2016 [50]</b>  | Value in Health       | ENG      | <b>SPECIFIC</b><br>patients with a coronary catheterization                                                     | <b>MP</b><br>vascular closing device <b>VS</b> manual compression after diagnostic/interventional catheterization | <b>PUBLIC</b><br>German Federal Ministry of Education and Research | CCA             | no          | <b>Hospital</b><br>University Hospital Tübingen         | costs and effects | yes      | n = 8665   | <b>service provider</b><br>hospital        | time period of hospital stay |

| Outcomes                                                                                                      | Costs                                                                                                                                                                             | Summary Measure unit                                                 | Sel. Bias considered | Methods for Sel. Bias     | Details on Methods                                                                                                                        | Data linkage                                                                                    | Handling of Uncertainty | Software                                                                                              |
|---------------------------------------------------------------------------------------------------------------|-----------------------------------------------------------------------------------------------------------------------------------------------------------------------------------|----------------------------------------------------------------------|----------------------|---------------------------|-------------------------------------------------------------------------------------------------------------------------------------------|-------------------------------------------------------------------------------------------------|-------------------------|-------------------------------------------------------------------------------------------------------|
| pruritus intensity; anxiety and depression; Patient Benefit Index score                                       | cost of inpatient treatment; outpatient treatment; medication; travel and other expenses of patient; costs for loss of time for skin care; indirect costs as loss of productivity | <b>ICER and separte</b><br>euros per benefit difference              | in part              | pre/post design           | -                                                                                                                                         | not addressed                                                                                   | confidence intervals    | <b>SPSS 22.0</b> for statistical analysis                                                             |
| mortality rates; major complications; average duration of hospital stay; average number of hospitalizations   | drug costs; hospital costs                                                                                                                                                        | <b>Seperate</b><br>number and rate of mortality; costs in US dollars | yes                  | propensity score matching | stepwise logistic regression; a priori selection of variables; 1:1 matching                                                               | not applicable for external sources; not addressed for linkage of inpatient and outpatient data | no                      | <b>SAS 9.2</b>                                                                                        |
| absolute and relative frequencies of complications; unadjusted realtive risk of complications; length of stay | hospital costs                                                                                                                                                                    | <b>Seperate</b><br>unadjusted RR in percent; costs in euros          | yes                  | regression analysis       | regression analysis to adjust length of stay and total costs; covariate adjustment using propensity score (not propensity score matching) | not applicable                                                                                  | confidence intervals    | <b>SAS 9.3</b> for statistical analysis; <b>MS Excel</b> and <b>PowerPoint</b> for tables and figures |

**CCA** = cost-consequences analysis; **CEA** = cost-effectiveness analysis; **CUA** = cost-utility analysis; **DALY** = disability-adjusted life years; **DDD** = defined daily dose; **ENG** = English; **GER** = German; **HCP** = health care program; **ICD-10-GM** = international classification of diseases revision 10 German modification; **ICER** = incremental cost-effectiveness ratio; **MP** = medical product or procedure; **NMB** = net monetary benefit; **QALY** = quality-adjusted life years; **QoT** = quarter of treatment; **SGB** = code of social law; **VS** = versus; **WTP** = willingness to pay
